# Supplementary material
Source: Springer Nature journal article supplement (https://www.springermedizin.de/resource/supplementary/12882_2011_328_MOESM3_ESM.pdf/9453614)

# Cumulative probability of survival

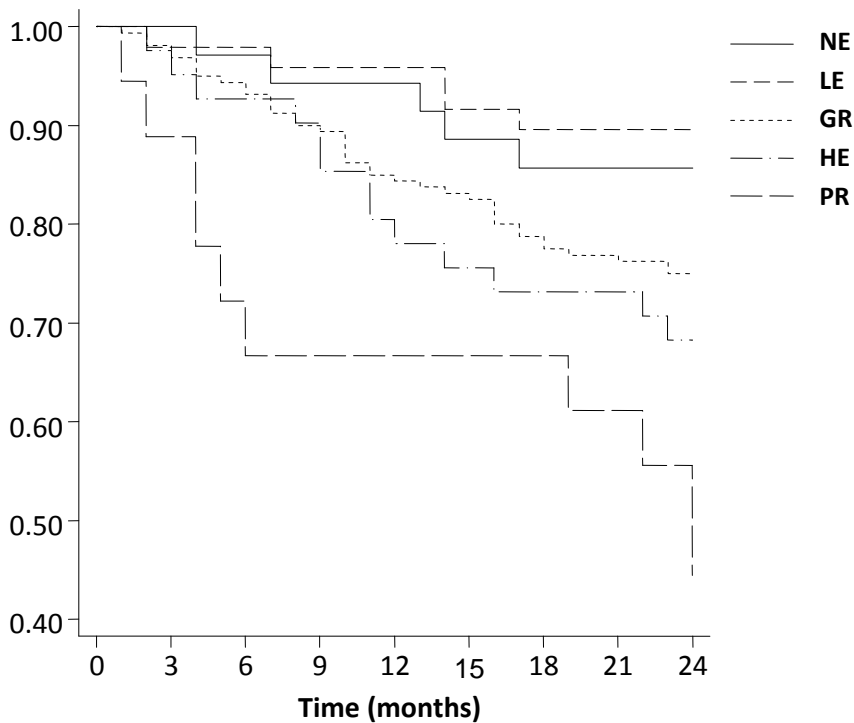

Supplement: MOESM3 [file 9453614]
